# Supplementary material for: NBR1 is a critical step in the repression of thermogenesis of p62-deficient adipocytes through PPARγ
Source: PubMed Central journal article supplement (PMC8129077; doi:10.1038/s41467-021-23085-0), 2021-05-17
Supplement: 41467_2021_23085_MOESM1_ESM.pdf [file 41467_2021_23085_MOESM1_ESM.pdf]

# SUPPLEMENTARY INFORMATION

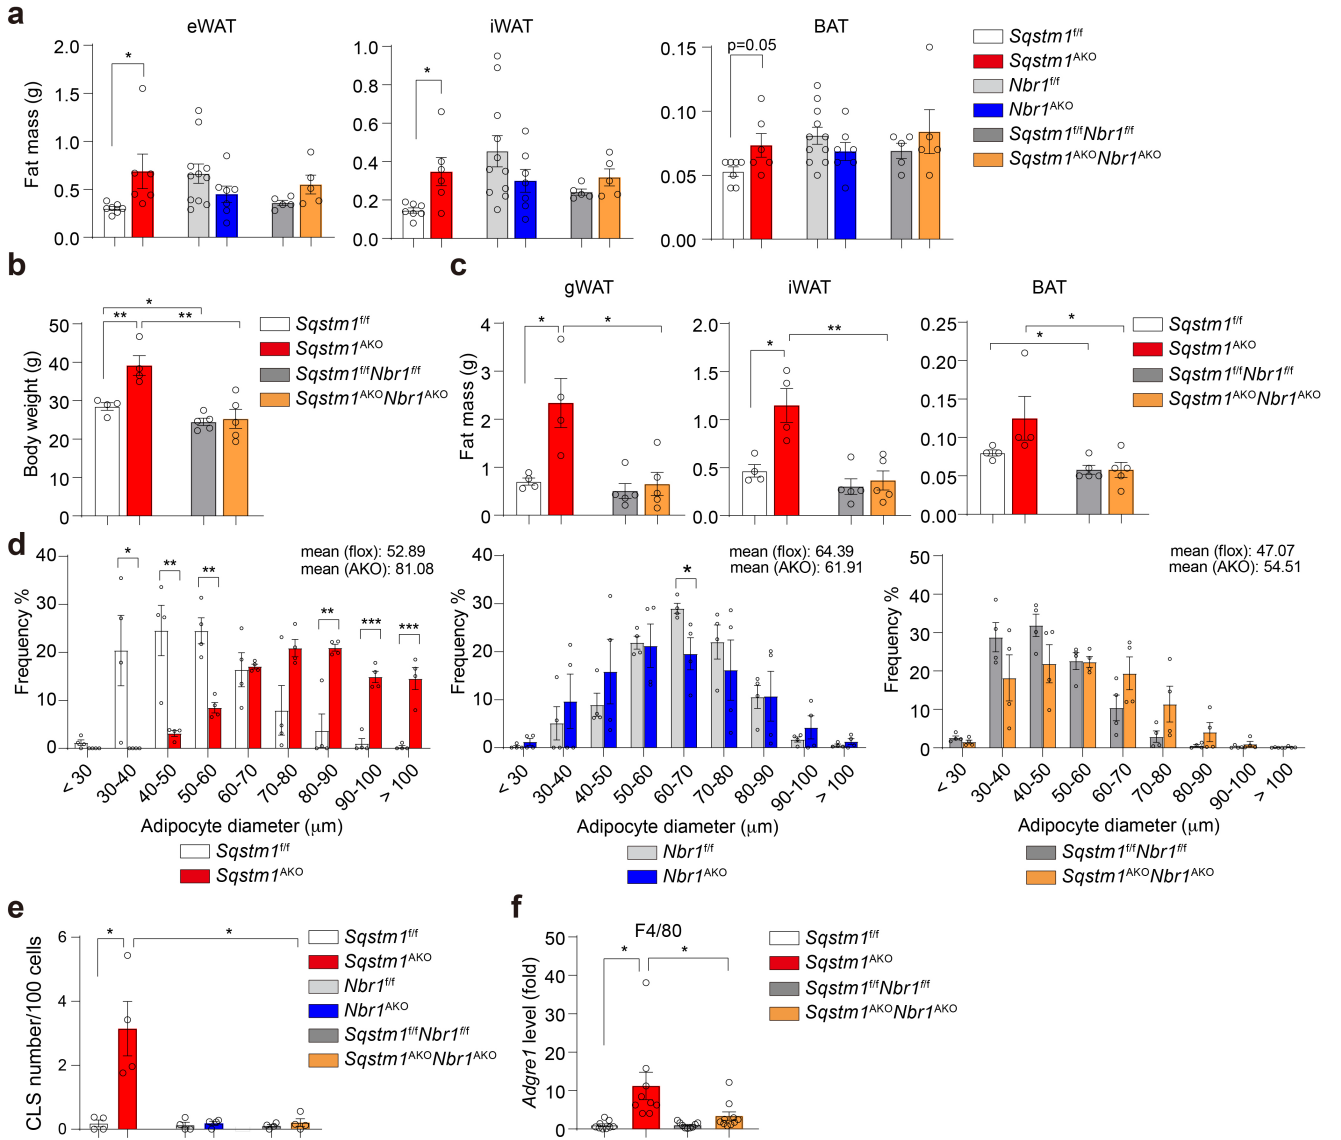

**Supplementary Fig. 1. Role of adipocyte *NBR1* in the control of adiposity.** **a** Fat tissue weight of eWAT, iWAT, BAT from adipocyte-specific knock out male mice at 10 - 12 weeks of age. *Sqstm1<sup>flf</sup>* (n = 7), *Sqstm1<sup>AKO</sup>* (n = 6), *Nbr1<sup>flf</sup>* (n = 11), *Nbr1<sup>AKO</sup>* (n = 7), *Sqstm1<sup>flf</sup> Nbr1<sup>flf</sup>* (n = 5) and *Sqstm1<sup>AKO</sup> Nbr1<sup>AKO</sup>* (n = 5).  $p = 0.0417$  (eWAT),  $p = 0.0138$  (iWAT) *Sqstm1<sup>AKO</sup>* vs *Sqstm1<sup>flf</sup>*. **b, c** Body weight (**b**) and fat tissue weight (**c**) of gWAT, iWAT, BAT from adipocyte-specific knock out female mice at 20 - 25 weeks of age. Results are presented as change fold related to individual controls. *Sqstm1<sup>flf</sup>* (n = 4), *Sqstm1<sup>AKO</sup>* (n = 4), *Sqstm1<sup>flf</sup> Nbr1<sup>flf</sup>* (n = 5) and *Sqstm1<sup>AKO</sup> Nbr1<sup>AKO</sup>* (n = 5). gWAT: gonadal WAT. **d** Adipocyte size measurement from H&E staining of eWAT from adipocyte-specific knock out male mice at 25 - 28 weeks of age (n = 4, per genotype). Distribution arrange and frequency was shown. **e** Quantification of CLS number in eWAT from staining described in (**d**) (n = 4, per genotype). CLS: clown-like structure. **f** qPCR analysis of macrophage marker F4/80 (encoded by *Adgre1*) in eWAT. Results are presented as change fold related to individual controls. WT (n = 9), *Sqstm1<sup>-/-</sup>* (n = 9), *Nbr1<sup>-/-</sup>* (n = 9) and *Sqstm1<sup>-/-</sup> Nbr1<sup>-/-</sup>* (n = 10). Data are presented as mean  $\pm$  s.e.m (**a - f**). \* $p < 0.05$ , \*\* $p < 0.01$ , \*\*\* $p < 0.001$ . Two tailed Student's T-test (**a - f**). Source data are provided as a Source Data file.

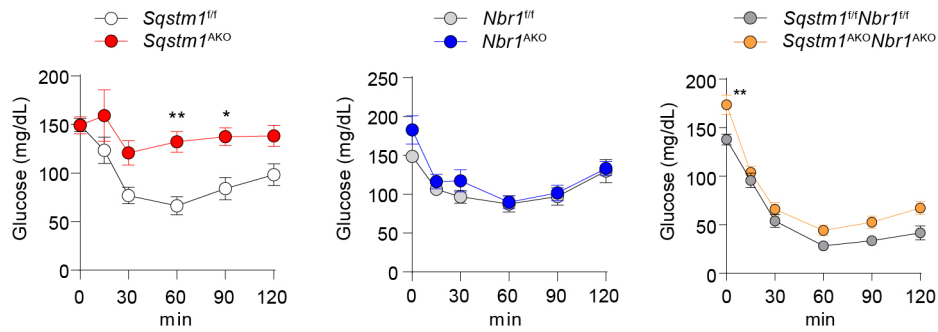

**Supplementary Fig. 2. Role of adipocyte *NBR1* in the control of insulin resistance.** Insulin tolerance test (ITT) were performed in male mice at 25 - 28 weeks of age. Results are presented as raw values. *Sqstm1<sup>f/f</sup>* (n = 7), *Sqstm1<sup>AKO</sup>* (n = 6), *Nbr1<sup>f/f</sup>* (n = 7), *Nbr1<sup>AKO</sup>* (n = 6), *Sqstm1<sup>f/f</sup>Nbr1<sup>f/f</sup>* (n = 8) and *Sqstm1<sup>AKO</sup>Nbr1<sup>AKO</sup>* (n = 11). Data are presented as mean  $\pm$  s.e.m. \* $p < 0.05$ , \*\* $p < 0.01$ . Two-way ANOVA followed by Bonferroni's post-test. Source data are provided as a Source Data file.

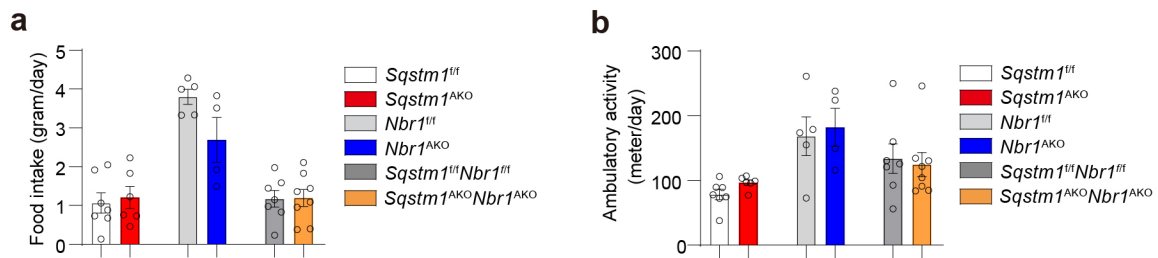

**Supplementary Fig. 3. Role of *NBR1* in systemic energy expenditure.** **a, b** Food intake (**a**) and sum of all directed ambulatory locomotor activity (**b**) were determined in male mice at 50 - 55 weeks-old using an automated indirect calorimetry system (CLAMS).  $Sqstm1^{f/f}$  (n = 7),  $Sqstm1^{AKO}$  (n = 6),  $Nbr1^{f/f}$  (n = 5),  $Nbr1^{AKO}$  (n = 4),  $Sqstm1^{f/f}Nbr1^{f/f}$  (n = 7) and  $Sqstm1^{AKO}Nbr1^{AKO}$  (n = 8). Results are presented as mean  $\pm$  s.e.m (**a, b**). Two-tailed Student's T-test (**a, b**). Source data are provided as a Source Data file.

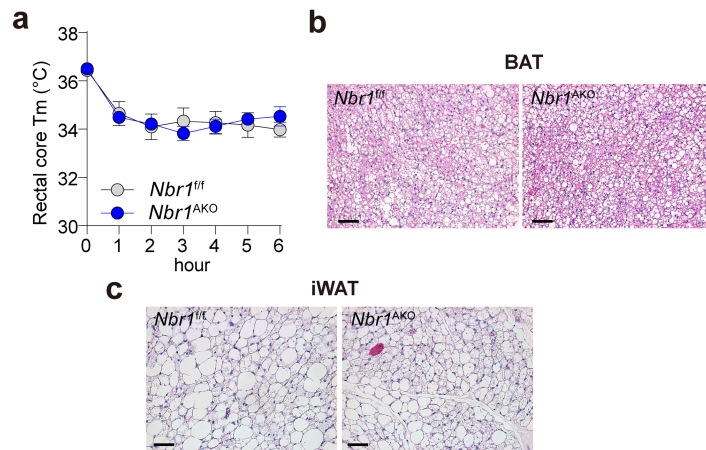

**Supplementary Fig. 4. Role of NBR1 in adaptive thermogenesis in BAT and inguinal WAT.**

**a,b** Male mice at 25-weeks of age were subjected to acute cold exposure (4°C) for 7 hours to stimulate brown thermogenesis. **a** Rectal core temperature was measured for consecutive 6 hours. *Nbr1<sup>fl/fl</sup>* (n = 6), *Nbr1<sup>AKO</sup>* (n = 6). Two-way ANOVA followed by Bonferroni's post-test. Data are presented as mean ± s.e.m. **b** Representative H&E staining in BAT of indicated mice (n = 3, per genotype). Scale bar = 100 µm. **c** Male mice at 25-weeks of age were injected with CL316,243 or saline as control for consecutive 5 days. Representative H&E staining in iWAT of indicated mice (n = 3, per genotype). Scale bar = 100 µm. Source data are provided as a Source Data file.

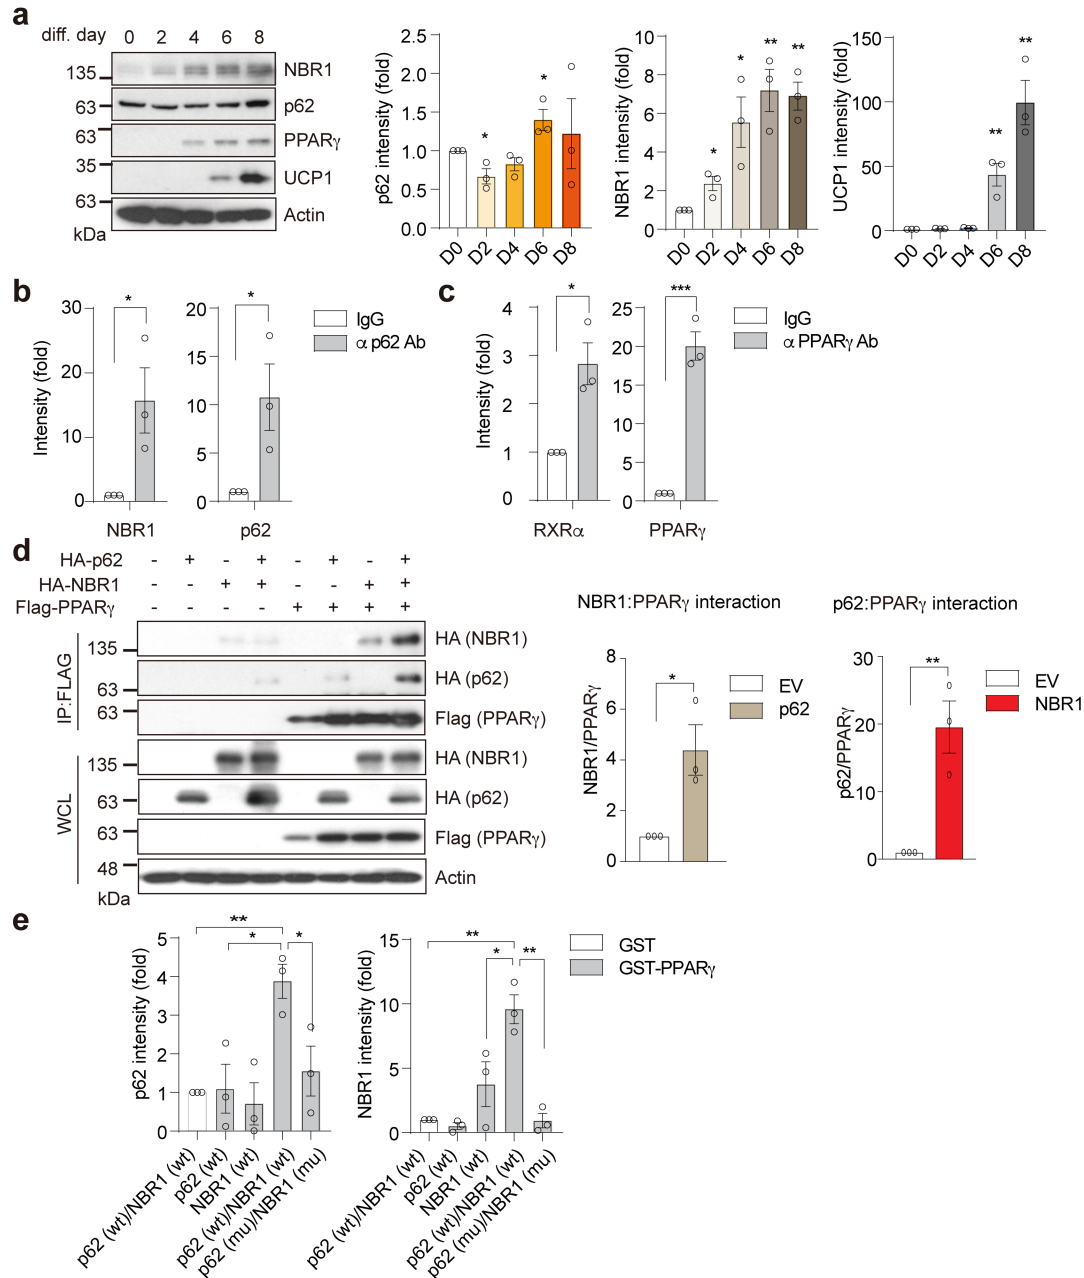

**Supplementary Fig. 5. p62 and NBR1 interact with PPAR $\gamma$  and controls its regulation thermogenesis in brown adipocytes.** **a** Representative immunoblotting of p62 and NBR1 levels during brown adipocyte differentiation. Densitometric quantification from 3 independent experiments was shown. **b, c** Endogenous interaction of PPAR $\gamma$  with p62 and NBR1. p62 (**b**) or

PPAR $\gamma$  (c) immunoprecipitates from nuclear lysates extracted from ISO and rosiglitazone-treated brown adipocytes were analyzed for the levels of specified proteins. Densitometric quantification was shown (n = 3 independent experiments for both). d HEK293T cells were transfected with HA-p62, HA-NBR1 and FLAG-tagged PPAR $\gamma$ . Anti-FLAG immunoprecipitates were analyzed by immunoblotting and densitometric quantification was shown (n = 3 independent experiments). e HEK293T cells were transfected with cDNA vectors expressing WT/mutants of HA-p62 or HA-NBR1, and GST-PPAR $\gamma$ . The interacting proteins were pulled down using glutathione-beads against GST-PPAR $\gamma$  and analyzed by immunoblotting. Densitometric quantification was shown (n = 3, independent experiments). Data are presented as mean  $\pm$  s.e.m (a - e). \* $p$  < 0.05, \*\* $p$  < 0.01, \*\*\* $p$  < 0.001 for Two tailed Student's T-test (a - e). Source data are provided as a Source Data file.

**Supplementary Table 1.** Quantitative PCR primer sequences

| <b>Gene Symbol</b>             | <b>Forward</b>           | <b>Reverse</b>           |
|--------------------------------|--------------------------|--------------------------|
| <i>Ldlr</i>                    | CAACAATGGTGGCTGTTCCCACAT | ACTCACACTTGTAGCTGCCTTCCA |
| <i>Fasn</i>                    | CTTCAACCTGGCCATGGTTTT    | GTTGGCGAAGCCGTAGTTAGTT   |
| <i>Srebf1</i>                  | TATGGAGGGCATGAAACCCGAAGT | TTGACCTGGCTATCCTCAAAGGCT |
| <i>Srebf2</i>                  | ATGGAGACCCTCACGGA        | TGCTGTTGTTGCCACTG        |
| <i>Hmgcr</i>                   | TCAGTGGGA ACTATTGCACCG   | TGGAATGACGGCTTCACAAAC    |
| <i>Ucp1</i>                    | TCTTCTCAGCCGGAGTTTCAGCTT | ACCTTGGATCTGAAGGCGGACTTT |
| <i>Dio2</i>                    | AAGGCTGCCGAATGTCAACGAATG | TGCTGGTTCAGACTCACCTTGGAA |
| <i>Cox7a</i>                   | CAGCGTCATGGTCAGTCTGT     | AGAAAACCGTGTGGCAGAGA     |
| <i>Pgc1a</i>                   | AGCTGTGTTTGACGACAAATC    | CGACACGGAGAGTTAAAGGAAG   |
| <i>CIDE<math>\alpha</math></i> | ATCACAACTGGCCTGGTTACG    | TACTACCCGGTGTCCATTTCT    |
| <i>Adgre1</i>                  | TGTCTGACAATTGGGATCTGCCCT | ATAGCTTCCGAGAGTGTTGTGGCA |
| <i>18s</i>                     | GTAACCCGTTGAACCCATT      | CCATCCAATCGGTAGTAGCG     |
